# Supplementary material
Source: Springer Nature journal article supplement (https://www.springermedizin.de/resource/supplementary/12943_2007_345_MOESM2_ESM.pdf/9553974)

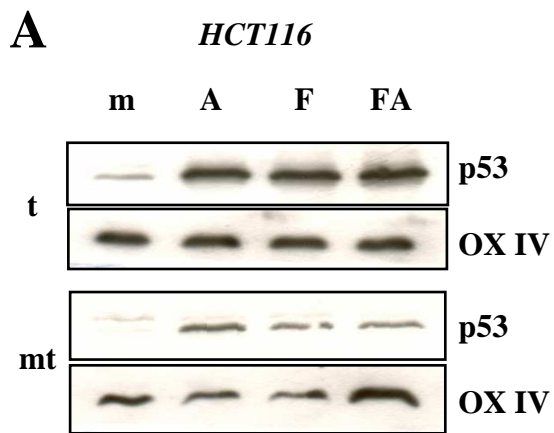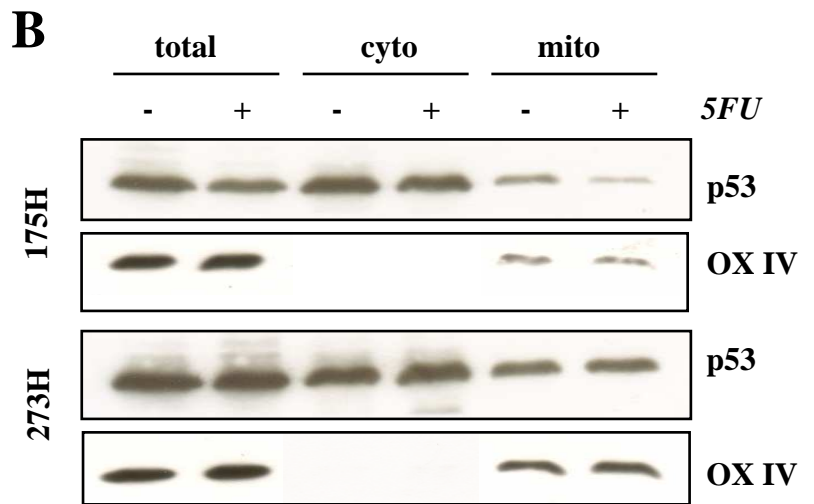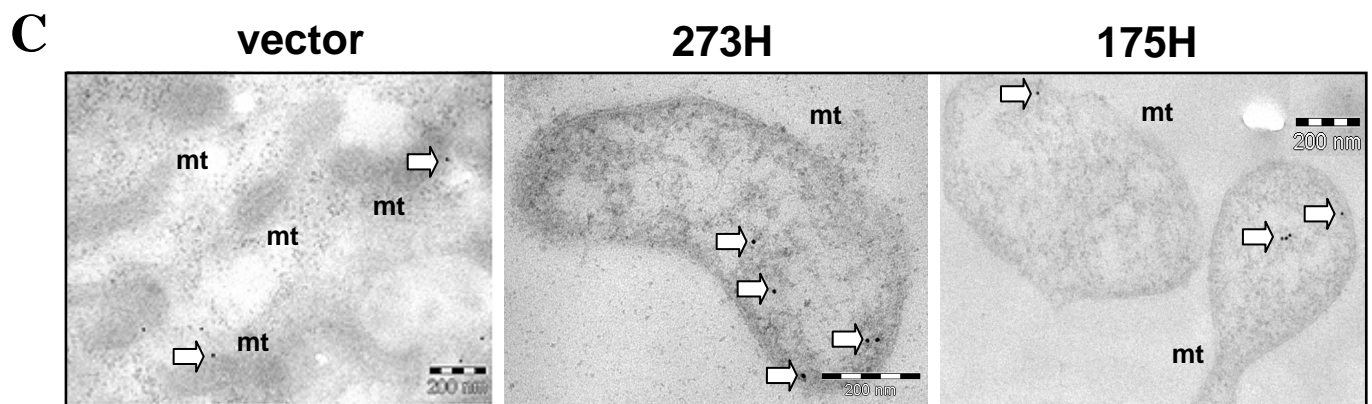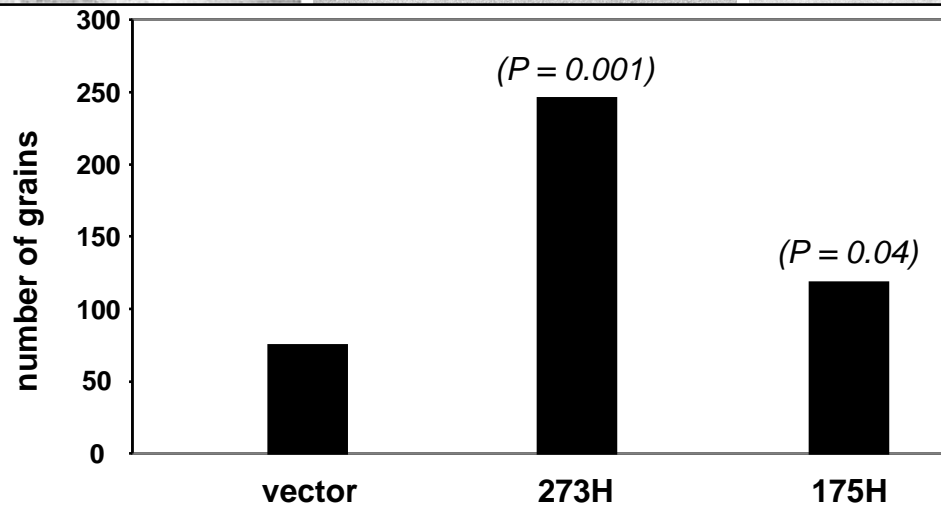

Supplement: MOESM2 [file 9553974]
